# Supplementary material for: Enzyme-Digested Edible Bird’s Nest (EBND) Prevents UV and Arid Environment-Induced Cellular Oxidative Stress, Cell Death and DNA Damage in Human Skin Keratinocytes and Three-Dimensional Epithelium Equivalents
Source: MDPI journal article supplement (doi:10.3390/antiox12030609), 2023-03-01
Supplement: s1 [file s1]

# Enzyme-digested edible bird's nest (EBND) prevents UV and arid environment-induced cellular oxidative stress, cell death and DNA damage in human skin keratinocytes and three-dimensional epithelium equivalents

## Supplemental materials

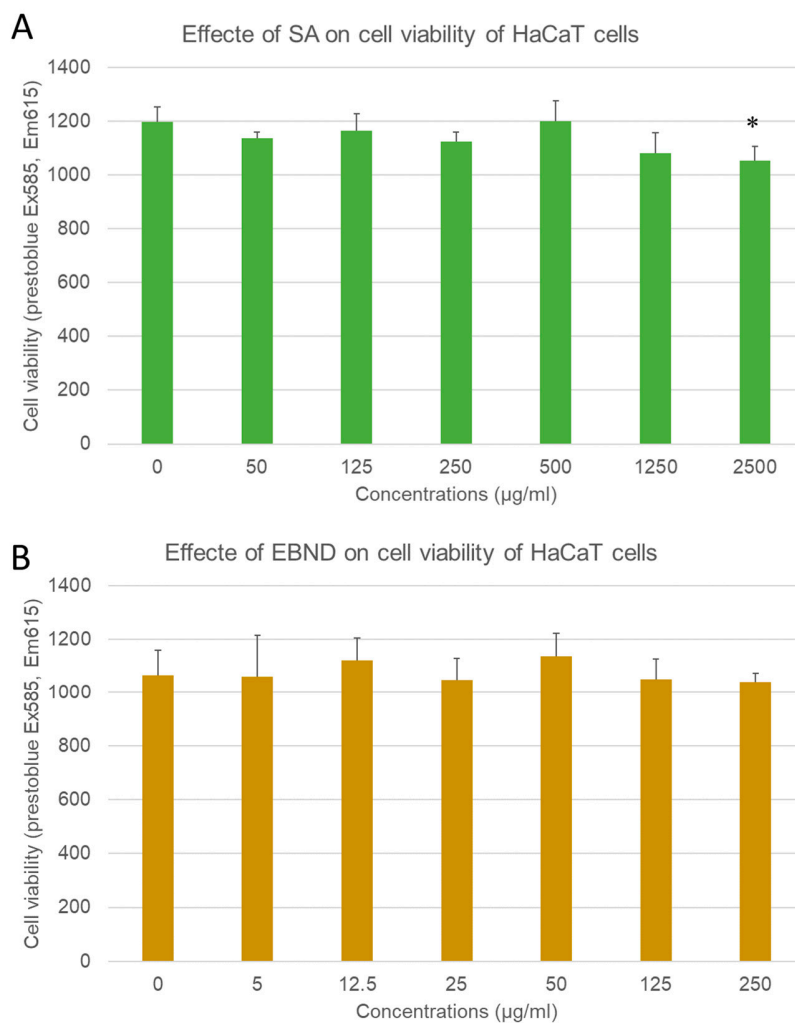

**Supplemental Figure 1. Effects of EBND and SA on cell viability in HaCaT cells**

HaCaT cells ( $1 \times 10^4$  cells/well) were seeded into 24-well plates and then incubated with SA and EBND at different concentrations for 48 hr. At the end of cultivation, cell viability was measured by ProstoBlue assay. \*,  $p < 0.05$  v.s. 0. Each bar represents the mean  $\pm$  SD of three independent experiments.

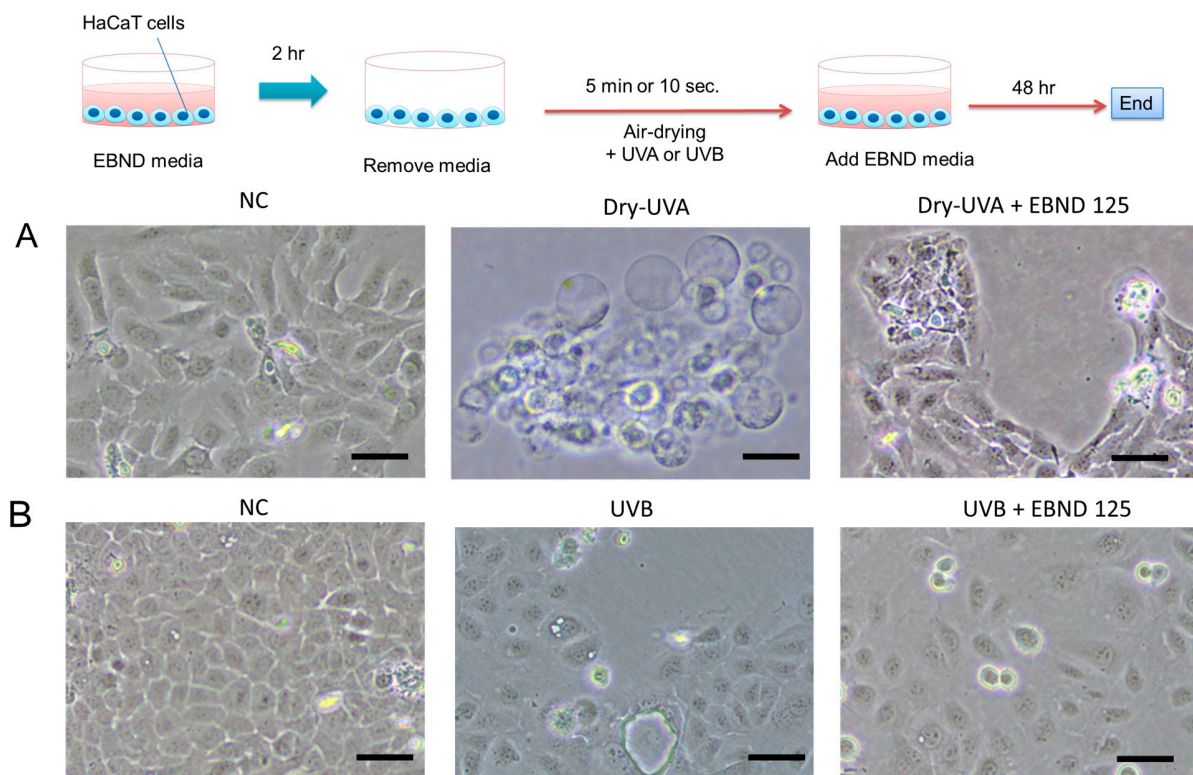

### Supplemental Figure 2. Morphological changes of HaCaT cells after Dry-UVA- and UVB-exposure

Illustration on the top represents procedures of the experiments. HaCaT cells ( $4 \times 10^4$ /well) were seeded into 24-well plates and incubated with EBND (125  $\mu\text{g}/\text{ml}$ ) for 2hr. Cells were then undergoing Dry-UVA- or UVB-exposure the same as the description in "Materials and Methods". (A) Typical phase-contrast microscopic images of HaCaT cells 48 hr after Dry-UVA-exposure. (B) Typical phase-contrast microscopic images of HaCaT cells 48 hr after UVB irradiation. All scale bars = 50  $\mu\text{m}$ .

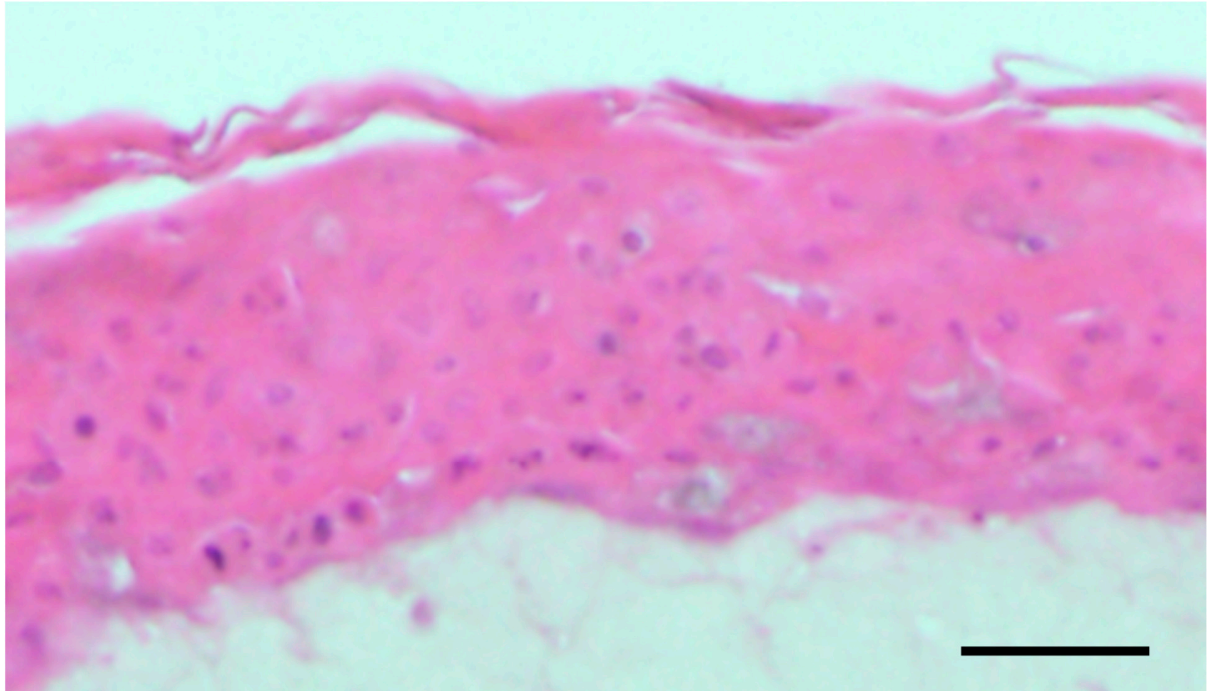

**Supplemental Figure 3. H&E staining for 3D epithelium equivalents**

The 3D epithelium equivalents were reconstructed the same as the description in “Materials and Methods”. At the end of cultivation, the tissues were fixed by 10% Formalin Neutral Buffer Solution at 4 °C overnight. The samples were then dehydrated by a series of ethanol and xylene and followed by paraffin embedding. The paraffin tissue blocks were sectioned to 10  $\mu\text{m}$ -thick slices by a microtome. After deparaffinization and hydration, the samples were stained by H&E reagents. Typical image shows the 3D epithelium without any treatment. Scale bars = 100  $\mu\text{m}$ .
